# Supplementary material for: GSK-3484862 targets DNMT1 for degradation in cells
Source: PubMed Central journal article supplement — NAR Cancer. 2023 May 17;5(2):zcad022. doi: 10.1093/narcan/zcad022 (PMC10189803; doi:10.1093/narcan/zcad022), 2023-05-17
Supplement: zcad022_supplemental_file.pdf [file zcad022_supplemental_file.pdf]

## Supplementary

### GSK-3484862 targets DNMT1 for degradation in cells

Qin Chen<sup>1,4</sup>, Bigang Liu<sup>1,4</sup>, Yang Zeng<sup>1,2,4</sup>, Jee Won Hwang<sup>1</sup>, Nan Dai<sup>3</sup>, Ivan R. Corrêa Jr.<sup>3</sup>, Marcos R. Estecio<sup>1</sup>, Xing Zhang<sup>1</sup>, Margarida A. Santos<sup>1,2</sup>, Taiping Chen<sup>1,2,\*</sup> and Xiaodong Cheng<sup>1,2,\*</sup>

<sup>1</sup> Department of Epigenetics and Molecular Carcinogenesis, University of Texas MD Anderson Cancer Center, Houston, TX 77030, USA;

<sup>2</sup> Program in Genetics and Epigenetics, The University of Texas MD Anderson Cancer Center UTHealth Graduate School of Biomedical Sciences, Houston, Texas 77030, USA;

<sup>3</sup> New England Biolabs, Inc, Ipswich, MA 01938 USA

<sup>4</sup> These authors contributed equally to this work

\* Corresponding authors: tchen2@mdanderson.org; xcheng5@mdanderson.org

Email addresses:

QC (QChen1@mdanderson.org); BL (biliu@mdanderson.org);

YZ (YZeng1@mdanderson.org); JWH (JHwang4@mdanderson.org);

ND (Dain@neb.com); IRC (correa@neb.com); MRE (mestecio@mdanderson.org);

XZ (XZhang21@mdanderson.org); MAS (MIAmeidaSantos@mdanderson.org);

TC (TChen2@mdanderson.org); XC (XCheng5@mdanderson.org)

**Table S1.** Oligonucleotides used in this study

**Figure S1.** GSK compounds induce DNMT1 depletion in GDM-1 cells.

Table S1. Oligonucleotides used in this study

| <b>Gene</b>                   |       | <b>Primers used for RT-qPCR</b>                                                                                                                                                                                                                                                                                       |  |             |                                                                        |
|-------------------------------|-------|-----------------------------------------------------------------------------------------------------------------------------------------------------------------------------------------------------------------------------------------------------------------------------------------------------------------------|--|-------------|------------------------------------------------------------------------|
| Human <i>DNMT1</i>            |       | Forward: 5'-GAG GCC TGG CCG GAA GCG CAA GCG C-3'<br>Reverse: 5'-GTC TCA GTT CCC TCT CCT TCA GCT G-3'                                                                                                                                                                                                                  |  |             |                                                                        |
| Human <i>IPO8</i>             |       | Forward: 5'-CTA TGC TCT CGT TCA GTA TGC-3'<br>Reverse: 5'-GTC CGA AAG ATC TCC ATC CA-3'                                                                                                                                                                                                                               |  |             |                                                                        |
| Human <i>RPLP0</i>            |       | Forward: 5'-TTC ATT GTG GGA GCA GAC-3'<br>Reverse: 5'-CAG CAG TTT CTC CAG AGC-3'                                                                                                                                                                                                                                      |  |             |                                                                        |
| Mouse <i>Dnmt1</i>            |       | Forward: 5'-CAT GGT GCT GAA GCT CAC ACT GCG-3'<br>Reverse: 5'-CAG CCA AGA TGA TGG CCC TCC TTC-3'                                                                                                                                                                                                                      |  |             |                                                                        |
| Mouse <i>Gapdh</i>            |       | Forward: 5'-AAG AGA GGC CCT ATC CCA ACT C-3'<br>Reverse: 5'-TTG TGG GTG CAG CGA ACT TTA TTG-3'                                                                                                                                                                                                                        |  |             |                                                                        |
| <b>Gene</b>                   |       | <b>Primers used for generating the PC:SF mutation (restriction sites for cloning underlined)</b>                                                                                                                                                                                                                      |  |             |                                                                        |
| Mouse <i>Dnmt1</i>            |       | Forward-1 (at 5' end): 5'-AAG <u>GCG GCC GCG CGA</u> ACA GCT CCA GCC CG-3'<br>Reverse-1 (at 3' end): 5'-GAG <u>CAC TAG TCC</u> TTG GTA GCA GCC-3'<br>Forward-2 (at PC motif): 5'-GCC <u>AAG CTT CCA</u> GGG CTT CAG TGG CAT GAA C-3'<br>Reverse-2 (at PC motif): 5'-TGG <u>AAG CTT GGC CCA</u> CCA CAC AGC ATC TCC-3' |  |             |                                                                        |
| <b>Specificity</b>            |       | <b>Oligo probe used for Southern blot</b>                                                                                                                                                                                                                                                                             |  |             |                                                                        |
| Mouse minor satellite repeats |       | [Biotin]-5'-ACT GAA AAA CAC ATT CGT TGG AAA CGG GAT TTG TAG AAC AGT GTA TAT CAA TGA GTT ACA ATG AG-3'                                                                                                                                                                                                                 |  |             |                                                                        |
| <b>Locus</b>                  |       | <b>Oligos used for bisulfite pyrosequencing</b>                                                                                                                                                                                                                                                                       |  | PCR product | Sequence to analyze (Y=C/T and R=G/A)                                  |
| Human <i>FOXP3</i>            | F2    | 5'-GGG GTT TGT ATT TGG GTT TTG T-3'                                                                                                                                                                                                                                                                                   |  | 132 bp      | TTY GTT ATT GAY<br>GTT ATG GYG GTY<br>GGA TGY GTY GGG<br>TTT TAT YGA T |
|                               | Rbio2 | [Biotin]-5'-AAT AAA ATA TCT ACC CTC TTC TCT TCC-3'                                                                                                                                                                                                                                                                    |  |             |                                                                        |
|                               | S2    | 5'-ATA GTT TTA GAT TTG TTT AGA TTT T-3'                                                                                                                                                                                                                                                                               |  |             |                                                                        |
| Human <i>H19</i>              | F2bio | [Biotin]-5'-GGG GGT TTT TGT ATA GTA TAT GGG T-3'                                                                                                                                                                                                                                                                      |  | 240 bp      | TAC CRC CRC RCR<br>ACC ACT TCC RAT TC                                  |
|                               | R2    | 5'-TCC CAT AAA TAT CCT ATT CCC AAA TAA C-3'                                                                                                                                                                                                                                                                           |  |             |                                                                        |
|                               | S2    | 5'-AAC TAT AA TAT ATA AAC CTA CAC-3'                                                                                                                                                                                                                                                                                  |  |             |                                                                        |
| Human <i>LINE1</i>            | F4    | 5'-TTT TGA GTT AGG TGT GGG ATA TA-3'                                                                                                                                                                                                                                                                                  |  | 146 bp      | TTY GTG GTG YGT<br>YGT TTT TTA AGT<br>YGG TTT G                        |
|                               | Rbio2 | [Biotin]-5'-AAA ATC AAA AAA TTC CCT TTC-3'                                                                                                                                                                                                                                                                            |  |             |                                                                        |
|                               | S4    | 5'-GGT GTG GGA TAT AGT-3'                                                                                                                                                                                                                                                                                             |  |             |                                                                        |

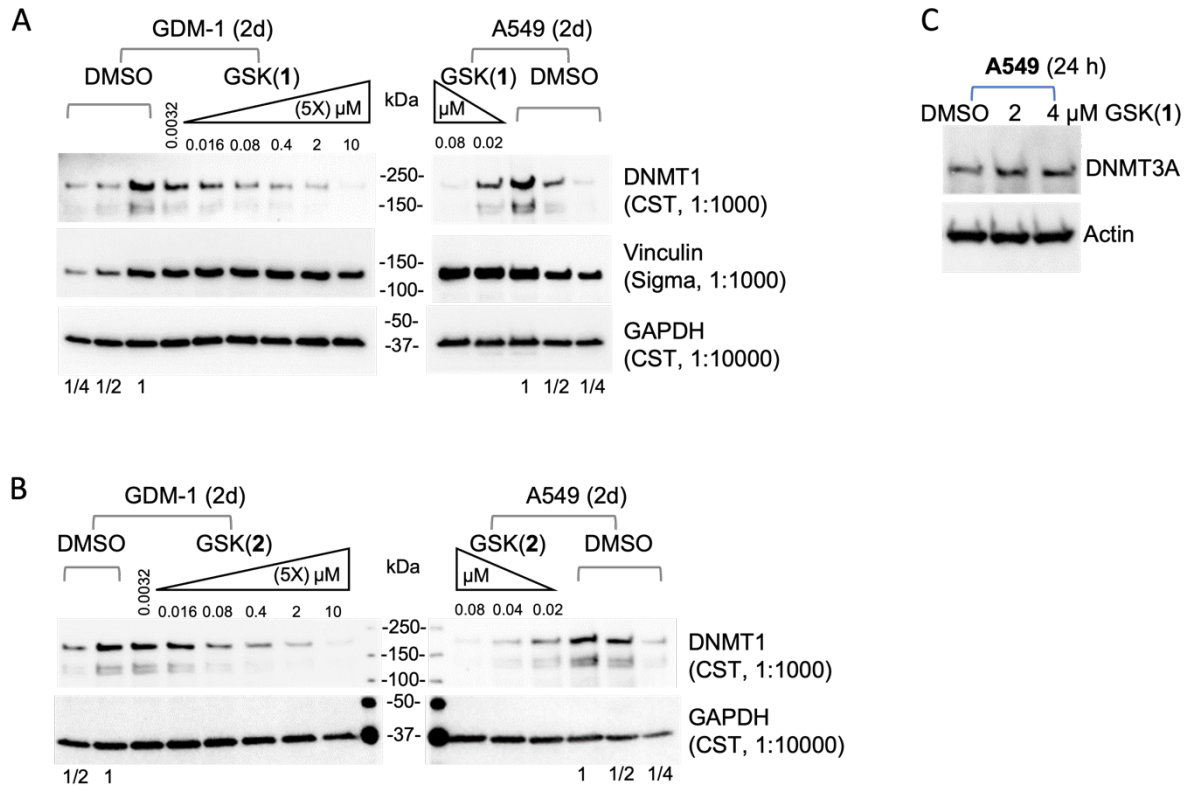

**Figure S1.** GSK compounds induce DNMT1 depletion in GDM-1 cells, but less severely compared to A549 cells. Shown are DNMT1 levels in cells treated with various concentrations of GSK(1) (A) or GSK(2) (B). The DMSO lanes are 2 $\times$  dilution of cell lysates as indicated (1, 1/2 and 1/4). (C) A repeated experiment showing that GSK(1) does not induce DNMT3A depletion.
